# Supplementary material for: Integrating Health Belief Model and Technology Acceptance Model: An Investigation of Health-Related Internet Use
Source: PubMed Central journal article supplement (PMC4376166; doi:10.2196/jmir.3564), 2015-02-19
Supplement: jmir_v17i2e45_app1.pdf [file jmir_v17i2e45_app1.pdf]

## Questionnaires

| Constructs                                          | Items                                                                                                                                                                                                                                                                                                                                                                                                                                                                                                                                                                                                 | Source(s)     |
|-----------------------------------------------------|-------------------------------------------------------------------------------------------------------------------------------------------------------------------------------------------------------------------------------------------------------------------------------------------------------------------------------------------------------------------------------------------------------------------------------------------------------------------------------------------------------------------------------------------------------------------------------------------------------|---------------|
| <b>Perceived susceptibility to chronic diseases</b> | 1-There is a great chance that I will be exposed to a chronic disease.<br>2-There is a person with chronic disease among my family members.<br>3-It is most likely that I will catch chronic diseases in my lifetime.<br>4-I have a higher likelihood of taking chronic diseases.                                                                                                                                                                                                                                                                                                                     | Items 1-3 [1] |
|                                                     | 5-I have a strong possibility of attack or deterioration of chronic disease due to improper daily habits (drinking, smoking, dietary habit, lack of exercise, etc.).<br>6-I would say that I am the type of person who is likely to get chronic diseases.                                                                                                                                                                                                                                                                                                                                             | Items 4-6 [2] |
| <b>Perceived severity to chronic diseases</b>       | 1-I am afraid of facing attack or deterioration of chronic diseases.<br>2-If I face attack or deterioration of chronic disease, I will have difficulty with my work life (or domestic affairs).<br>3-If I face attack or deterioration of chronic disease, it will hinder my personal relationships.<br>4-If I face attack or deterioration of chronic disease, I will be long haunted by resultant problems.                                                                                                                                                                                         | [2]           |
|                                                     | 1-I have the impression that I sacrifice a lot for my health.<br>2-I consider myself very health conscious.<br>3-I think that I take health into account a lot in my life.                                                                                                                                                                                                                                                                                                                                                                                                                            |               |
| <b>Health consciousness</b>                         | 4-I think it is important to know well how to stay healthy.<br>5-My health is so valuable to me, that I am prepared to sacrifice many things for it.<br>6-I have the impression that other people pay more attention to their health than I do. (R)<br>7-I do not continually ask myself whether something is good for me. (R)<br>8-I really don't think often about whether everything I do is healthy. (R)<br>9-I don't want to ask myself all the time, whether the things I eat are good for me. (R)<br>10-I often dwell on my health.<br>11-I am prepared to do many things to have good health. | [3]           |
|                                                     | 1-Using the Internet for health information is useful in managing my daily health.<br>2-Using the Internet for health information is advantageous in better managing my health.<br>3-Using the Internet for health information is beneficial to me.<br>4-Using the Internet for health information is valuable to my healthcare.                                                                                                                                                                                                                                                                      | [4]           |
| <b>Perceived usefulness of the Internet</b>         | 1-Learning to use the Internet for searching health information was easy for me.<br>2-My interaction with the Internet for health information is clear and understandable.<br>3-I find the Internet for health information to be flexible to interact with.<br>4-It is easy for me to become skillful at using the Internet for health information.                                                                                                                                                                                                                                                   | [4]           |
| <b>Perceived ease of Internet use</b>               | 1-Using the Internet for seeking health information and health management would be a good idea.<br>2-Using the Internet for seeking health information would be a wise idea.<br>3-I like the idea of using the Internet for seeking health information and health management.<br>4-Using the Internet for seeking health information and health management would be a pleasant experience.                                                                                                                                                                                                            | [5]           |
| <b>Attitude</b>                                     | 1-I use the Internet to get general health information.<br>2-I use the Internet to get description of various diseases.                                                                                                                                                                                                                                                                                                                                                                                                                                                                               | Items 1-7 [6] |
| <b>Internet use for health information</b>          |                                                                                                                                                                                                                                                                                                                                                                                                                                                                                                                                                                                                       |               |

|                                                 |                                                                                                                                                            |                   |
|-------------------------------------------------|------------------------------------------------------------------------------------------------------------------------------------------------------------|-------------------|
|                                                 | <hr/> <u>3-I use the Internet to get information on medicine/drug.</u>                                                                                     | Items 8 & 9 [2]   |
|                                                 | 4-I use the Internet to be equipped with information before/after doctor's appointment.                                                                    | Items 10 & 11 [7] |
|                                                 | 5-I use the Internet to decide about whether or not to visit a doctor.                                                                                     |                   |
|                                                 | 6-I use the Internet to decide about how to treat an illness.                                                                                              |                   |
|                                                 | 7-I use the Internet to understand how to deal with an illness.                                                                                            |                   |
| <b>seeking</b>                                  | 8-I use the Internet to get information on treatments/therapy/ diagnosis.                                                                                  |                   |
|                                                 | 9-I use the Internet to get information on hospitals/clinics/other healthcare facilities.                                                                  |                   |
|                                                 | 10-I use the Internet to get information on health management (exercise, abstinence from drinking, smoking, diet, nutrition, stress, mental health, etc.). |                   |
|                                                 | 11-I use the Internet to get information on how to care for oneself.                                                                                       |                   |
|                                                 | 1-I use the Internet to get social support from other users via bulletin board, chat room, or conference.                                                  |                   |
|                                                 | 2-I use the Internet to get online medical consultation from medical professionals.                                                                        |                   |
|                                                 | 3-I use the Internet to interact with people with similar health                                                                                           |                   |
| <b>Internet use to communicate about health</b> | conditions.                                                                                                                                                | Item 1 & 2 [6]    |
|                                                 | 4-I use the Internet to use mail to communicate with a doctor or a doctor's office.                                                                        | Items 3-5 [7]     |
|                                                 | <hr/> 5-I use the Internet to share and exchange experiences about health and diseases                                                                     |                   |

## References

1. Bryan AD, Aiken LS, West SG. Young women's condom use: The influence of acceptance of sexuality, control over the sexual encounter, and perceived susceptibility to common STDs. *Health Psychology*. 1997;16(5):468-479. PMID: 9302544
  
2. Kim J, Park H-A. Development of a Health Information Technology Acceptance Model Using Consumers' Health Behavior Intention. *Journal of Medical Internet Research*. 2012;14(5):e133. Doi: 10.2196/jmir.2143 PMID: 23026508
  
3. Chen MF. The joint moderating effect of health consciousness and healthy lifestyle on consumers' willingness to use functional foods in Taiwan. *Appetite*. 2011;57(1):253-262. Doi: 10.1016/j.appet.2011.05.305. PMID: 21609743

4. Davis F. Perceived usefulness, perceived ease of use, and user acceptance of information technology. *Management Information Systems Quarterly*. 1989;13(3):319-340.
  
5. Wong CK, Yeung DY, Ho HC, Tse K-P, Lam C-Y. Chinese Older Adults' Internet Use for Health Information. *Journal of Applied Gerontology*. 2012;32(8):1-20. Doi: 10.1177/0733464812463430. PMID: 24717738
  
6. Yoo EY, Robbins LS. Understanding middle-aged women's health information seeking on the web: A theoretical approach. *Journal of the American Society for Information Science and Technology*. 2008;59(4):577-590. Doi: 10.1002/asi.20766
  
7. Hale TM, Cotten SR, Drentea P, Goldner M. Rural-urban differences in general and health-related internet use. *American Behavioral Scientist*. 2010;53(9):1304-1325. Doi: 10.1177/0002764210361685.
